# Supplementary material for: Convolutional neural network for human cancer types prediction by integrating protein interaction networks and omics data
Source: Sci Rep. 2021 Oct 19;11:20691. doi: 10.1038/s41598-021-98814-y (PMC8526703; doi:10.1038/s41598-021-98814-y)
Supplement: Supplementary file 1 — Supplementary Information 1. [file 41598_2021_98814_MOESM1_ESM.xlsx]

## Sheet: 50 random sets accuracy
Shuffle rounds	Accuracy
random.shuffle_1	0.954
random.shuffle_2	0.952
random.shuffle_3	0.957
random.shuffle_4	0.96
random.shuffle_5	0.952
random.shuffle_6	0.953
random.shuffle_7	0.955
random.shuffle_8	0.956
random.shuffle_9	0.952
random.shuffle_10	0.956
random.shuffle_11	0.951
random.shuffle_12	0.956
random.shuffle_13	0.956
random.shuffle_14	0.952
random.shuffle_15	0.956
random.shuffle_16	0.954
random.shuffle_17	0.96
random.shuffle_18	0.958
random.shuffle_19	0.958
random.shuffle_20	0.959
random.shuffle_21	0.95
random.shuffle_22	0.957
random.shuffle_23	0.954
random.shuffle_24	0.957
random.shuffle_25	0.959
random.shuffle_26	0.961
random.shuffle_27	0.956
random.shuffle_28	0.959
random.shuffle_29	0.96
random.shuffle_30	0.962
random.shuffle_31	0.954
random.shuffle_32	0.955
random.shuffle_33	0.96
random.shuffle_34	0.96
random.shuffle_35	0.953
random.shuffle_36	0.954
random.shuffle_37	0.954
random.shuffle_38	0.954
random.shuffle_39	0.961
random.shuffle_40	0.955
random.shuffle_41	0.949
random.shuffle_42	0.953
random.shuffle_43	0.955
random.shuffle_44	0.957
random.shuffle_45	0.955
random.shuffle_46	0.959
random.shuffle_47	0.958
random.shuffle_48	0.948
random.shuffle_49	0.952
random.shuffle_50	0.955

## Sheet: confusion matrix
random.shuffle_1_predicted_result_20212241534																Accuracy
	CancerTypes	Normal	BRCA	KIRC	LUAD	THCA	PRAD	LUSC	LIHC	HNSC	COAD	STAD	KIRP	All		0.954
Truth classes	Normal	293	0	0	0	1	4	0	0	3	0	0	0	301
	BRCA	5	912	0	0	0	0	2	0	5	0	0	0	924
	KIRC	4	2	404	0	1	0	0	1	0	0	0	13	425
	LUAD	8	3	0	382	0	0	31	1	0	0	0	0	425
	THCA	4	0	0	0	411	0	0	0	0	0	0	0	415
	PRAD	22	0	0	0	0	397	0	0	0	0	0	0	419
	LUSC	3	1	0	22	0	0	368	1	28	0	0	1	424
	LIHC	8	2	0	0	0	0	0	286	0	0	0	0	296
	HNSC	2	3	0	0	0	0	11	0	438	0	0	0	454
	COAD	0	0	0	0	0	0	0	0	0	222	0	0	222
	STAD	5	3	0	1	0	0	0	1	2	5	344	0	361
	KIRP	0	0	15	0	0	0	0	0	0	0	0	227	242
	All	354	926	419	405	413	401	412	290	476	227	344	241	4908
random.shuffle_2_predicted_result_20212241534																Accuracy
	CancerTypes	Normal	BRCA	KIRC	LUAD	THCA	PRAD	LUSC	LIHC	HNSC	COAD	STAD	KIRP	All		0.952
Truth classes	Normal	293	1	1	0	0	3	0	1	2	0	0	0	301
	BRCA	6	917	0	0	0	0	1	0	0	0	0	0	924
	KIRC	6	2	400	0	0	0	0	1	0	0	0	16	425
	LUAD	9	3	0	404	0	0	9	0	0	0	0	0	425
	THCA	16	0	0	0	399	0	0	0	0	0	0	0	415
	PRAD	17	0	0	0	0	402	0	0	0	0	0	0	419
	LUSC	1	5	0	37	0	0	369	0	12	0	0	0	424
	LIHC	8	1	0	0	0	0	0	286	0	0	1	0	296
	HNSC	3	2	0	0	0	0	8	0	441	0	0	0	454
	COAD	1	0	0	0	0	0	0	0	0	210	11	0	222
	STAD	4	1	0	2	0	0	1	3	3	12	335	0	361
	KIRP	4	2	15	5	1	0	0	0	0	0	0	215	242
	All	368	934	416	448	400	405	388	291	458	222	347	231	4908
random.shuffle_3_predicted_result_20212241534																Accuracy
	CancerTypes	Normal	BRCA	KIRC	LUAD	THCA	PRAD	LUSC	LIHC	HNSC	COAD	STAD	KIRP	All		0.957
Truth classes	Normal	293	1	0	0	0	5	0	0	2	0	0	0	301
	BRCA	8	910	0	0	1	0	2	0	3	0	0	0	924
	KIRC	1	0	409	0	0	0	1	1	0	0	2	11	425
	LUAD	8	1	0	405	1	0	9	1	0	0	0	0	425
	THCA	5	0	0	0	410	0	0	0	0	0	0	0	415
	PRAD	14	0	0	0	0	405	0	0	0	0	0	0	419
	LUSC	2	0	0	28	0	0	382	1	11	0	0	0	424
	LIHC	8	0	3	0	0	0	0	280	0	0	4	1	296
	HNSC	4	1	0	0	0	0	18	0	431	0	0	0	454
	COAD	0	0	0	0	0	0	0	0	1	215	6	0	222
	STAD	11	0	0	0	0	0	1	0	2	10	337	0	361
	KIRP	2	0	17	1	0	0	1	0	0	0	0	221	242
	All	356	913	429	434	412	410	414	283	450	225	349	233	4908
random.shuffle_4_predicted_result_20212241534																Accuracy
	CancerTypes	Normal	BRCA	KIRC	LUAD	THCA	PRAD	LUSC	LIHC	HNSC	COAD	STAD	KIRP	All		0.96
Truth classes	Normal	294	0	0	0	1	5	0	0	1	0	0	0	301
	BRCA	4	913	0	0	0	0	1	0	6	0	0	0	924
	KIRC	4	4	402	0	0	0	0	1	0	0	0	14	425
	LUAD	6	1	0	394	0	0	23	0	1	0	0	0	425
	THCA	5	0	0	0	410	0	0	0	0	0	0	0	415
	PRAD	13	0	0	0	0	406	0	0	0	0	0	0	419
	LUSC	1	0	0	23	0	0	381	1	18	0	0	0	424
	LIHC	7	0	0	0	0	0	0	289	0	0	0	0	296
	HNSC	1	1	0	0	0	0	16	0	435	1	0	0	454
	COAD	0	0	0	0	0	0	0	0	0	218	4	0	222
	STAD	1	0	0	0	0	0	0	2	3	8	347	0	361
	KIRP	4	1	11	2	0	0	2	0	0	0	0	222	242
	All	340	920	413	419	411	411	423	293	464	227	351	236	4908
random.shuffle_5_predicted_result_20212241535																Accuracy
	CancerTypes	Normal	BRCA	KIRC	LUAD	THCA	PRAD	LUSC	LIHC	HNSC	COAD	STAD	KIRP	All		0.952
Truth classes	Normal	292	1	1	0	0	6	0	0	1	0	0	0	301
	BRCA	8	908	1	0	0	0	2	0	5	0	0	0	924
	KIRC	6	2	396	0	0	0	0	0	1	0	0	20	425
	LUAD	7	2	0	399	0	0	13	1	2	0	1	0	425
	THCA	23	0	0	0	392	0	0	0	0	0	0	0	415
	PRAD	12	0	0	0	0	407	0	0	0	0	0	0	419
	LUSC	0	4	0	31	0	0	357	0	32	0	0	0	424
	LIHC	2	1	1	0	0	0	0	292	0	0	0	0	296
	HNSC	4	2	0	0	0	0	11	0	437	0	0	0	454
	COAD	0	0	0	0	0	0	0	0	0	217	5	0	222
	STAD	6	1	0	0	0	0	0	2	2	2	348	0	361
	KIRP	2	1	7	0	0	0	4	0	0	0	0	228	242
	All	362	922	406	430	392	413	387	295	480	219	354	248	4908
random.shuffle_6_predicted_result_20212241535																Accuracy
	CancerTypes	Normal	BRCA	KIRC	LUAD	THCA	PRAD	LUSC	LIHC	HNSC	COAD	STAD	KIRP	All		0.953
Truth classes	Normal	294	0	1	0	1	4	0	0	1	0	0	0	301
	BRCA	9	911	1	0	0	0	1	0	2	0	0	0	924
	KIRC	2	1	417	0	0	0	0	1	0	0	0	4	425
	LUAD	4	3	0	403	0	0	11	1	0	0	3	0	425
	THCA	13	0	0	0	402	0	0	0	0	0	0	0	415
	PRAD	10	0	0	0	0	409	0	0	0	0	0	0	419
	LUSC	1	4	0	26	0	0	378	1	14	0	0	0	424
	LIHC	6	0	3	0	0	0	0	287	0	0	0	0	296
	HNSC	10	2	0	0	0	0	36	0	406	0	0	0	454
	COAD	0	0	0	0	0	0	0	0	0	221	1	0	222
	STAD	8	0	1	0	0	0	0	2	4	2	344	0	361
	KIRP	1	1	33	1	0	0	2	0	1	0	0	203	242
	All	358	922	456	430	403	413	428	292	428	223	348	207	4908
random.shuffle_7_predicted_result_20212241535																Accuracy
	CancerTypes	Normal	BRCA	KIRC	LUAD	THCA	PRAD	LUSC	LIHC	HNSC	COAD	STAD	KIRP	All		0.955
Truth classes	Normal	295	1	0	0	0	2	0	0	3	0	0	0	301
	BRCA	4	918	0	0	0	0	1	0	1	0	0	0	924
	KIRC	1	4	409	0	0	0	0	1	0	0	1	9	425
	LUAD	4	2	0	399	0	0	19	0	0	0	1	0	425
	THCA	9	0	0	0	406	0	0	0	0	0	0	0	415
	PRAD	15	0	0	0	0	404	0	0	0	0	0	0	419
	LUSC	2	1	1	28	0	0	381	0	11	0	0	0	424
	LIHC	5	2	0	0	0	0	0	289	0	0	0	0	296
	HNSC	2	5	0	0	0	0	28	0	419	0	0	0	454
	COAD	0	0	0	0	0	0	0	0	0	217	5	0	222
	STAD	7	0	0	1	0	0	1	1	2	6	343	0	361
	KIRP	2	2	30	2	1	0	0	0	0	0	0	205	242
	All	346	935	440	430	407	406	430	291	436	223	350	214	4908
random.shuffle_8_predicted_result_20212241535																Accuracy
	CancerTypes	Normal	BRCA	KIRC	LUAD	THCA	PRAD	LUSC	LIHC	HNSC	COAD	STAD	KIRP	All		0.956
Truth classes	Normal	297	0	0	0	0	4	0	0	0	0	0	0	301
	BRCA	9	907	3	0	0	0	2	0	3	0	0	0	924
	KIRC	3	0	409	0	0	0	0	1	0	0	0	12	425
	LUAD	6	4	2	400	0	0	12	0	0	0	1	0	425
	THCA	9	0	0	0	406	0	0	0	0	0	0	0	415
	PRAD	14	0	0	0	0	405	0	0	0	0	0	0	419
	LUSC	3	6	1	27	0	0	372	1	14	0	0	0	424
	LIHC	7	0	3	1	0	0	0	285	0	0	0	0	296
	HNSC	7	1	0	0	0	0	25	0	421	0	0	0	454
	COAD	0	0	0	0	0	0	0	0	0	219	3	0	222
	STAD	5	0	0	1	0	0	0	1	3	5	346	0	361
	KIRP	3	1	11	0	0	0	2	0	0	0	0	225	242
	All	363	919	429	429	406	409	413	288	441	224	350	237	4908
random.shuffle_9_predicted_result_20212241535																Accuracy
	CancerTypes	Normal	BRCA	KIRC	LUAD	THCA	PRAD	LUSC	LIHC	HNSC	COAD	STAD	KIRP	All		0.952
Truth classes	Normal	296	0	0	0	1	3	0	0	1	0	0	0	301
	BRCA	6	913	0	0	0	0	0	0	5	0	0	0	924
	KIRC	1	5	395	1	0	0	0	1	0	0	0	22	425
	LUAD	9	2	0	407	0	0	5	2	0	0	0	0	425
	THCA	9	0	0	0	406	0	0	0	0	0	0	0	415
	PRAD	13	0	0	0	0	406	0	0	0	0	0	0	419
	LUSC	5	4	0	34	0	0	363	1	16	0	0	1	424
	LIHC	8	0	1	0	0	0	0	287	0	0	0	0	296
	HNSC	4	1	0	0	0	0	9	2	438	0	0	0	454
	COAD	1	0	0	0	0	0	0	0	0	209	12	0	222
	STAD	12	2	0	0	0	0	1	1	3	13	329	0	361
	KIRP	1	1	12	1	0	0	2	0	0	0	0	225	242
	All	365	928	408	443	407	409	380	294	463	222	341	248	4908
random.shuffle_10_predicted_result_20212241535																Accuracy
	CancerTypes	Normal	BRCA	KIRC	LUAD	THCA	PRAD	LUSC	LIHC	HNSC	COAD	STAD	KIRP	All		0.956
Truth classes	Normal	297	0	0	0	0	2	0	1	1	0	0	0	301
	BRCA	10	909	0	0	0	0	1	0	3	0	1	0	924
	KIRC	2	0	408	0	0	0	0	0	0	0	0	15	425
	LUAD	11	2	0	398	0	0	14	0	0	0	0	0	425
	THCA	7	0	0	0	408	0	0	0	0	0	0	0	415
	PRAD	23	0	0	0	0	396	0	0	0	0	0	0	419
	LUSC	3	2	0	31	0	0	379	0	9	0	0	0	424
	LIHC	4	0	2	0	0	0	0	290	0	0	0	0	296
	HNSC	3	2	0	0	0	0	28	0	421	0	0	0	454
	COAD	1	0	0	0	0	0	0	0	0	217	4	0	222
	STAD	8	1	0	0	0	0	0	2	4	8	338	0	361
	KIRP	1	0	8	0	0	0	4	0	0	0	0	229	242
	All	370	916	418	429	408	398	426	293	438	225	343	244	4908
random.shuffle_11_predicted_result_20212241536																Accuracy
	CancerTypes	Normal	BRCA	KIRC	LUAD	THCA	PRAD	LUSC	LIHC	HNSC	COAD	STAD	KIRP	All		0.951
Truth classes	Normal	294	0	0	0	2	4	0	1	0	0	0	0	301
	BRCA	10	911	1	0	0	0	1	0	1	0	0	0	924
	KIRC	1	3	409	0	0	0	0	1	0	0	0	11	425
	LUAD	5	3	0	406	0	0	11	0	0	0	0	0	425
	THCA	9	0	0	0	406	0	0	0	0	0	0	0	415
	PRAD	13	0	0	0	0	406	0	0	0	0	0	0	419
	LUSC	2	0	0	31	1	0	380	0	10	0	0	0	424
	LIHC	3	0	2	0	0	0	1	289	0	0	0	1	296
	HNSC	4	3	0	0	0	0	29	0	416	1	0	1	454
	COAD	0	0	0	0	0	0	0	0	0	217	5	0	222
	STAD	16	0	0	0	0	0	0	2	3	17	322	1	361
	KIRP	2	0	26	0	0	0	4	0	0	0	0	210	242
	All	359	920	438	437	409	410	426	293	430	235	327	224	4908
random.shuffle_12_predicted_result_20212241536																Accuracy
	CancerTypes	Normal	BRCA	KIRC	LUAD	THCA	PRAD	LUSC	LIHC	HNSC	COAD	STAD	KIRP	All		0.956
Truth classes	Normal	295	0	1	0	1	4	0	0	0	0	0	0	301
	BRCA	7	911	0	0	0	0	2	0	4	0	0	0	924
	KIRC	1	2	405	0	0	0	0	1	0	0	0	16	425
	LUAD	7	4	1	402	0	0	10	0	0	0	1	0	425
	THCA	6	0	0	0	409	0	0	0	0	0	0	0	415
	PRAD	11	0	0	0	0	408	0	0	0	0	0	0	419
	LUSC	4	3	0	34	0	0	361	1	21	0	0	0	424
	LIHC	9	0	2	1	0	0	0	283	0	0	1	0	296
	HNSC	9	2	0	0	0	0	8	0	435	0	0	0	454
	COAD	0	0	0	0	0	0	0	0	0	213	9	0	222
	STAD	16	0	0	0	0	0	0	1	4	4	336	0	361
	KIRP	0	1	7	0	0	0	1	0	0	0	0	233	242
	All	365	923	416	437	410	412	382	286	464	217	347	249	4908
random.shuffle_13_predicted_result_20212241536																Accuracy
	CancerTypes	Normal	BRCA	KIRC	LUAD	THCA	PRAD	LUSC	LIHC	HNSC	COAD	STAD	KIRP	All		0.956
Truth classes	Normal	288	1	1	0	1	10	0	0	0	0	0	0	301
	BRCA	7	914	0	0	0	0	2	0	1	0	0	0	924
	KIRC	2	3	407	1	0	0	1	1	0	0	0	10	425
	LUAD	4	3	0	404	0	0	12	1	0	0	1	0	425
	THCA	7	0	0	0	408	0	0	0	0	0	0	0	415
	PRAD	8	0	0	0	0	411	0	0	0	0	0	0	419
	LUSC	2	4	0	29	0	0	378	1	10	0	0	0	424
	LIHC	7	0	0	0	0	0	1	288	0	0	0	0	296
	HNSC	5	5	0	0	0	0	17	0	427	0	0	0	454
	COAD	1	0	0	0	0	0	0	0	1	215	5	0	222
	STAD	8	0	0	0	0	0	0	1	5	18	329	0	361
	KIRP	0	1	14	1	0	0	1	0	0	0	0	225	242
	All	339	931	422	435	409	421	412	292	444	233	335	235	4908
random.shuffle_14_predicted_result_20212241536																Accuracy
	CancerTypes	Normal	BRCA	KIRC	LUAD	THCA	PRAD	LUSC	LIHC	HNSC	COAD	STAD	KIRP	All		0.952
Truth classes	Normal	296	0	1	0	2	1	0	0	1	0	0	0	301
	BRCA	9	908	1	0	0	0	3	0	3	0	0	0	924
	KIRC	3	1	406	0	0	0	0	2	0	0	0	13	425
	LUAD	5	2	1	402	0	0	15	0	0	0	0	0	425
	THCA	3	0	0	0	412	0	0	0	0	0	0	0	415
	PRAD	19	1	0	0	0	399	0	0	0	0	0	0	419
	LUSC	3	2	0	32	0	0	376	0	10	0	0	1	424
	LIHC	5	0	2	0	0	0	0	289	0	0	0	0	296
	HNSC	6	1	1	0	0	1	31	0	414	0	0	0	454
	COAD	1	0	0	0	0	0	0	0	0	217	4	0	222
	STAD	10	1	0	0	0	0	0	1	4	6	339	0	361
	KIRP	2	0	23	1	0	0	0	0	0	0	0	216	242
	All	362	916	435	435	414	401	425	292	432	223	343	230	4908
random.shuffle_15_predicted_result_20212241536																Accuracy
	CancerTypes	Normal	BRCA	KIRC	LUAD	THCA	PRAD	LUSC	LIHC	HNSC	COAD	STAD	KIRP	All		0.956
Truth classes	Normal	295	0	0	0	1	5	0	0	0	0	0	0	301
	BRCA	7	911	1	0	0	0	3	0	2	0	0	0	924
	KIRC	5	0	400	0	0	0	0	1	0	0	0	19	425
	LUAD	10	1	0	397	0	0	15	1	0	0	1	0	425
	THCA	12	0	0	0	403	0	0	0	0	0	0	0	415
	PRAD	9	0	0	0	0	410	0	0	0	0	0	0	419
	LUSC	2	1	0	27	0	0	376	1	17	0	0	0	424
	LIHC	4	0	4	0	0	0	0	288	0	0	0	0	296
	HNSC	7	2	0	0	0	0	24	0	421	0	0	0	454
	COAD	1	0	0	0	0	0	0	0	0	216	5	0	222
	STAD	5	0	0	1	0	0	1	3	2	3	346	0	361
	KIRP	1	0	8	2	0	0	0	0	1	0	0	230	242
	All	358	915	413	427	404	415	419	294	443	219	352	249	4908
random.shuffle_16_predicted_result_20212241537																Accuracy
	CancerTypes	Normal	BRCA	KIRC	LUAD	THCA	PRAD	LUSC	LIHC	HNSC	COAD	STAD	KIRP	All		0.954
Truth classes	Normal	298	0	0	0	0	2	0	0	1	0	0	0	301
	BRCA	8	913	2	0	0	0	0	0	1	0	0	0	924
	KIRC	3	0	407	0	0	0	0	1	0	0	0	14	425
	LUAD	11	1	1	394	0	0	17	0	0	0	1	0	425
	THCA	8	0	0	0	407	0	0	0	0	0	0	0	415
	PRAD	26	1	0	0	0	392	0	0	0	0	0	0	419
	LUSC	3	4	0	30	0	0	372	1	14	0	0	0	424
	LIHC	7	0	1	0	0	0	0	288	0	0	0	0	296
	HNSC	5	4	0	0	0	0	12	0	433	0	0	0	454
	COAD	0	0	0	0	0	0	0	0	0	217	5	0	222
	STAD	6	0	1	0	0	0	1	1	4	11	337	0	361
	KIRP	2	1	12	1	0	0	0	0	3	0	0	223	242
	All	377	924	424	425	407	394	402	291	456	228	343	237	4908
random.shuffle_17_predicted_result_20212241537																Accuracy
	CancerTypes	Normal	BRCA	KIRC	LUAD	THCA	PRAD	LUSC	LIHC	HNSC	COAD	STAD	KIRP	All		0.96
Truth classes	Normal	293	1	0	0	0	3	0	2	2	0	0	0	301
	BRCA	1	920	1	0	0	0	0	0	2	0	0	0	924
	KIRC	4	1	405	0	1	0	0	1	0	0	0	13	425
	LUAD	8	2	1	401	0	0	12	1	0	0	0	0	425
	THCA	10	0	0	0	405	0	0	0	0	0	0	0	415
	PRAD	8	0	0	0	0	411	0	0	0	0	0	0	419
	LUSC	1	1	0	32	1	0	377	1	11	0	0	0	424
	LIHC	3	0	4	0	0	0	0	289	0	0	0	0	296
	HNSC	2	2	2	0	0	0	11	0	437	0	0	0	454
	COAD	1	0	0	0	0	0	0	0	0	217	4	0	222
	STAD	3	0	1	0	0	0	0	2	4	5	346	0	361
	KIRP	3	1	22	2	2	0	1	0	0	0	0	211	242
	All	337	928	436	435	409	414	401	296	456	222	350	224	4908
random.shuffle_18_predicted_result_20212241537																Accuracy
	CancerTypes	Normal	BRCA	KIRC	LUAD	THCA	PRAD	LUSC	LIHC	HNSC	COAD	STAD	KIRP	All		0.958
Truth classes	Normal	297	1	0	0	0	1	0	0	2	0	0	0	301
	BRCA	2	917	1	0	0	0	2	0	2	0	0	0	924
	KIRC	4	1	407	0	0	0	0	0	0	0	0	13	425
	LUAD	8	3	1	396	0	0	16	1	0	0	0	0	425
	THCA	11	0	0	0	404	0	0	0	0	0	0	0	415
	PRAD	20	0	0	0	0	399	0	0	0	0	0	0	419
	LUSC	3	0	0	25	0	0	381	0	15	0	0	0	424
	LIHC	5	0	1	0	0	0	1	288	0	0	1	0	296
	HNSC	3	3	0	0	0	0	18	0	430	0	0	0	454
	COAD	1	0	0	0	0	0	0	0	0	217	4	0	222
	STAD	7	1	0	1	0	0	2	1	2	7	340	0	361
	KIRP	1	0	11	0	0	0	4	0	0	0	0	226	242
	All	362	926	421	422	404	400	424	290	451	224	345	239	4908
random.shuffle_19_predicted_result_20212241537																Accuracy
	CancerTypes	Normal	BRCA	KIRC	LUAD	THCA	PRAD	LUSC	LIHC	HNSC	COAD	STAD	KIRP	All		0.958
Truth classes	Normal	295	0	1	0	0	1	0	0	4	0	0	0	301
	BRCA	6	914	0	0	0	0	1	0	3	0	0	0	924
	KIRC	2	2	402	1	0	0	0	1	1	0	0	16	425
	LUAD	7	3	0	391	0	0	21	1	0	0	2	0	425
	THCA	9	0	0	0	406	0	0	0	0	0	0	0	415
	PRAD	14	0	0	0	0	405	0	0	0	0	0	0	419
	LUSC	1	0	0	22	0	1	381	1	18	0	0	0	424
	LIHC	7	1	1	0	0	0	0	286	1	0	0	0	296
	HNSC	1	3	0	0	0	0	12	0	438	0	0	0	454
	COAD	1	0	0	0	0	0	0	0	1	217	3	0	222
	STAD	7	0	0	1	0	0	1	2	4	7	339	0	361
	KIRP	2	2	7	0	0	0	1	0	0	0	0	230	242
	All	352	925	411	415	406	407	417	291	470	224	344	246	4908
random.shuffle_20_predicted_result_20212241537																Accuracy
	CancerTypes	Normal	BRCA	KIRC	LUAD	THCA	PRAD	LUSC	LIHC	HNSC	COAD	STAD	KIRP	All		0.959
Truth classes	Normal	295	1	1	0	1	2	0	0	1	0	0	0	301
	BRCA	10	912	0	0	0	0	2	0	0	0	0	0	924
	KIRC	4	4	400	2	0	0	0	1	0	0	0	14	425
	LUAD	7	2	0	399	0	0	14	0	2	0	1	0	425
	THCA	7	0	0	0	408	0	0	0	0	0	0	0	415
	PRAD	18	0	0	0	0	401	0	0	0	0	0	0	419
	LUSC	4	2	0	29	0	0	375	1	13	0	0	0	424
	LIHC	2	1	0	0	0	0	0	293	0	0	0	0	296
	HNSC	3	1	0	0	0	0	17	0	433	0	0	0	454
	COAD	0	0	0	0	0	0	0	0	0	216	6	0	222
	STAD	4	0	0	0	0	0	0	1	4	2	350	0	361
	KIRP	1	1	13	0	0	0	1	0	2	0	0	224	242
	All	355	924	414	430	409	403	409	296	455	218	357	238	4908
random.shuffle_21_predicted_result_20212241537																Accuracy
	CancerTypes	Normal	BRCA	KIRC	LUAD	THCA	PRAD	LUSC	LIHC	HNSC	COAD	STAD	KIRP	All		0.95
Truth classes	Normal	293	5	0	0	0	2	0	0	1	0	0	0	301
	BRCA	2	914	0	0	1	0	0	0	7	0	0	0	924
	KIRC	5	2	402	0	0	0	0	4	0	0	0	12	425
	LUAD	5	1	0	392	0	0	25	1	0	0	1	0	425
	THCA	8	0	0	0	407	0	0	0	0	0	0	0	415
	PRAD	13	0	0	0	0	406	0	0	0	0	0	0	419
	LUSC	4	0	0	26	0	0	381	1	11	0	0	1	424
	LIHC	9	0	0	0	0	0	0	286	0	0	1	0	296
	HNSC	4	1	0	0	0	0	27	0	422	0	0	0	454
	COAD	1	0	0	0	0	0	0	0	0	214	7	0	222
	STAD	12	0	0	0	0	0	1	4	2	14	328	0	361
	KIRP	3	0	20	0	0	0	1	0	0	0	0	218	242
	All	359	923	422	418	408	408	435	296	443	228	337	231	4908
random.shuffle_22_predicted_result_20212241538																Accuracy
	CancerTypes	Normal	BRCA	KIRC	LUAD	THCA	PRAD	LUSC	LIHC	HNSC	COAD	STAD	KIRP	All		0.957
Truth classes	Normal	291	1	1	0	0	5	0	0	3	0	0	0	301
	BRCA	3	915	0	0	0	0	1	1	4	0	0	0	924
	KIRC	1	0	411	0	0	0	1	1	0	0	0	11	425
	LUAD	9	3	0	396	0	0	15	2	0	0	0	0	425
	THCA	7	0	0	0	408	0	0	0	0	0	0	0	415
	PRAD	16	0	0	0	0	403	0	0	0	0	0	0	419
	LUSC	2	1	0	23	0	0	384	1	13	0	0	0	424
	LIHC	7	0	0	0	0	0	0	289	0	0	0	0	296
	HNSC	1	2	0	0	0	0	25	1	425	0	0	0	454
	COAD	0	0	0	0	0	0	0	0	0	218	4	0	222
	STAD	11	0	1	0	0	0	0	2	2	13	332	0	361
	KIRP	2	1	12	1	0	0	0	0	0	0	0	226	242
	All	350	923	425	420	408	408	426	297	447	231	336	237	4908
random.shuffle_23_predicted_result_20212241538																Accuracy
	CancerTypes	Normal	BRCA	KIRC	LUAD	THCA	PRAD	LUSC	LIHC	HNSC	COAD	STAD	KIRP	All		0.954
Truth classes	Normal	294	0	1	0	0	3	0	0	2	0	1	0	301
	BRCA	11	910	1	0	0	0	1	0	1	0	0	0	924
	KIRC	7	1	398	1	0	0	0	1	0	0	0	17	425
	LUAD	6	2	0	402	0	0	13	0	0	0	2	0	425
	THCA	7	0	0	0	408	0	0	0	0	0	0	0	415
	PRAD	21	0	0	0	0	398	0	0	0	0	0	0	419
	LUSC	2	4	0	29	0	0	369	0	20	0	0	0	424
	LIHC	9	0	3	0	0	0	0	284	0	0	0	0	296
	HNSC	1	2	1	0	0	0	16	0	434	0	0	0	454
	COAD	1	0	0	0	0	0	0	0	0	212	9	0	222
	STAD	8	1	0	0	0	0	0	0	0	1	351	0	361
	KIRP	2	2	11	2	0	0	1	0	0	0	0	224	242
	All	369	922	415	434	408	401	400	285	457	213	363	241	4908
random.shuffle_24_predicted_result_20212241538																Accuracy
	CancerTypes	Normal	BRCA	KIRC	LUAD	THCA	PRAD	LUSC	LIHC	HNSC	COAD	STAD	KIRP	All		0.957
Truth classes	Normal	295	1	1	0	1	3	0	0	0	0	0	0	301
	BRCA	2	921	0	0	0	0	1	0	0	0	0	0	924
	KIRC	4	3	404	0	0	0	0	1	1	0	0	12	425
	LUAD	6	2	1	395	0	0	20	0	0	0	1	0	425
	THCA	7	0	0	0	408	0	0	0	0	0	0	0	415
	PRAD	23	0	0	0	0	396	0	0	0	0	0	0	419
	LUSC	3	2	0	24	0	0	368	0	25	0	0	2	424
	LIHC	10	0	2	0	0	0	0	283	1	0	0	0	296
	HNSC	1	4	0	0	0	0	8	0	441	0	0	0	454
	COAD	1	0	0	0	0	0	0	0	0	218	3	0	222
	STAD	6	3	0	0	0	0	2	0	0	11	339	0	361
	KIRP	3	1	10	0	0	0	0	0	0	0	0	228	242
	All	361	937	418	419	409	399	399	284	468	229	343	242	4908
random.shuffle_25_predicted_result_20212241538																Accuracy
	CancerTypes	Normal	BRCA	KIRC	LUAD	THCA	PRAD	LUSC	LIHC	HNSC	COAD	STAD	KIRP	All		0.959
Truth classes	Normal	297	1	0	0	1	1	0	0	1	0	0	0	301
	BRCA	6	914	0	0	0	0	2	0	2	0	0	0	924
	KIRC	3	4	405	0	0	0	1	1	0	0	0	11	425
	LUAD	11	1	0	392	0	0	21	0	0	0	0	0	425
	THCA	7	0	0	0	408	0	0	0	0	0	0	0	415
	PRAD	23	0	0	0	0	396	0	0	0	0	0	0	419
	LUSC	4	0	0	23	0	0	390	0	7	0	0	0	424
	LIHC	9	1	1	0	0	0	1	284	0	0	0	0	296
	HNSC	2	1	0	0	0	0	18	0	433	0	0	0	454
	COAD	0	0	0	0	0	0	0	0	0	215	7	0	222
	STAD	5	1	0	0	0	0	2	0	2	5	346	0	361
	KIRP	2	2	9	0	1	0	2	0	0	0	0	226	242
	All	369	925	415	415	410	397	437	285	445	220	353	237	4908
random.shuffle_26_predicted_result_20212241538																Accuracy
	CancerTypes	Normal	BRCA	KIRC	LUAD	THCA	PRAD	LUSC	LIHC	HNSC	COAD	STAD	KIRP	All		0.961
Truth classes	Normal	290	2	1	0	1	4	0	1	2	0	0	0	301
	BRCA	2	915	1	0	0	0	3	0	3	0	0	0	924
	KIRC	2	3	408	1	0	0	0	0	0	0	0	11	425
	LUAD	5	2	0	400	0	0	16	1	0	0	1	0	425
	THCA	8	1	0	0	406	0	0	0	0	0	0	0	415
	PRAD	8	0	0	0	0	411	0	0	0	0	0	0	419
	LUSC	3	3	0	24	0	0	387	1	6	0	0	0	424
	LIHC	4	0	2	0	0	0	0	290	0	0	0	0	296
	HNSC	4	3	0	0	0	0	20	0	426	0	0	1	454
	COAD	0	0	0	0	0	0	0	0	0	214	8	0	222
	STAD	6	0	0	1	0	0	0	2	1	6	345	0	361
	KIRP	1	2	12	1	0	0	1	0	1	0	0	224	242
	All	333	931	424	427	407	415	427	295	439	220	354	236	4908
random.shuffle_27_predicted_result_20212241539																Accuracy
	CancerTypes	Normal	BRCA	KIRC	LUAD	THCA	PRAD	LUSC	LIHC	HNSC	COAD	STAD	KIRP	All		0.956
Truth classes	Normal	293	0	0	0	1	5	0	1	1	0	0	0	301
	BRCA	4	915	0	1	0	0	1	0	3	0	0	0	924
	KIRC	5	2	413	0	0	0	0	0	0	0	0	5	425
	LUAD	10	2	0	396	0	0	16	0	0	0	1	0	425
	THCA	6	0	0	0	409	0	0	0	0	0	0	0	415
	PRAD	10	0	0	0	0	409	0	0	0	0	0	0	419
	LUSC	3	3	0	26	0	0	374	1	16	0	0	1	424
	LIHC	10	0	2	0	0	0	1	282	0	0	1	0	296
	HNSC	2	3	1	0	0	0	13	0	435	0	0	0	454
	COAD	1	0	0	0	0	0	0	0	0	217	4	0	222
	STAD	8	0	1	0	0	0	1	1	4	11	335	0	361
	KIRP	2	0	26	0	0	0	0	0	0	0	0	214	242
	All	354	925	443	423	410	414	406	285	459	228	341	220	4908
random.shuffle_28_predicted_result_20212241539																Accuracy
	CancerTypes	Normal	BRCA	KIRC	LUAD	THCA	PRAD	LUSC	LIHC	HNSC	COAD	STAD	KIRP	All		0.959
Truth classes	Normal	296	0	0	0	1	2	0	0	2	0	0	0	301
	BRCA	9	912	0	0	0	0	1	0	2	0	0	0	924
	KIRC	1	4	411	0	0	0	0	0	0	0	0	9	425
	LUAD	6	3	0	404	0	0	11	0	0	0	1	0	425
	THCA	7	0	0	0	408	0	0	0	0	0	0	0	415
	PRAD	22	0	0	0	0	397	0	0	0	0	0	0	419
	LUSC	4	4	0	28	0	0	375	1	11	0	0	1	424
	LIHC	2	0	4	0	0	0	0	290	0	0	0	0	296
	HNSC	3	4	0	0	0	0	20	0	427	0	0	0	454
	COAD	1	0	0	0	0	0	0	0	0	216	5	0	222
	STAD	7	0	0	1	0	0	0	0	1	5	347	0	361
	KIRP	0	0	17	0	0	0	1	0	0	0	0	224	242
	All	358	927	432	433	409	399	408	291	443	221	353	234	4908
random.shuffle_29_predicted_result_20212241539																Accuracy
	CancerTypes	Normal	BRCA	KIRC	LUAD	THCA	PRAD	LUSC	LIHC	HNSC	COAD	STAD	KIRP	All		0.96
Truth classes	Normal	294	1	1	0	1	2	0	0	2	0	0	0	301
	BRCA	4	914	0	0	0	0	1	0	5	0	0	0	924
	KIRC	4	4	400	0	0	0	1	0	0	0	0	16	425
	LUAD	6	2	0	394	0	0	22	1	0	0	0	0	425
	THCA	8	0	0	0	407	0	0	0	0	0	0	0	415
	PRAD	18	0	0	0	0	401	0	0	0	0	0	0	419
	LUSC	1	2	0	22	0	0	384	1	14	0	0	0	424
	LIHC	6	1	3	0	0	0	0	286	0	0	0	0	296
	HNSC	4	2	0	0	0	0	5	0	443	0	0	0	454
	COAD	1	0	0	0	0	0	0	0	0	218	3	0	222
	STAD	8	2	0	0	0	0	0	2	3	5	341	0	361
	KIRP	2	1	9	0	0	0	0	0	1	0	0	229	242
	All	356	929	413	416	408	403	413	290	468	223	344	245	4908
random.shuffle_30_predicted_result_20212241539																Accuracy
	CancerTypes	Normal	BRCA	KIRC	LUAD	THCA	PRAD	LUSC	LIHC	HNSC	COAD	STAD	KIRP	All		0.962
Truth classes	Normal	297	0	1	0	1	1	0	0	1	0	0	0	301
	BRCA	6	915	1	0	0	0	1	0	0	0	1	0	924
	KIRC	2	1	406	0	0	0	0	1	0	0	0	15	425
	LUAD	8	0	0	397	0	0	18	1	0	0	1	0	425
	THCA	2	0	0	0	413	0	0	0	0	0	0	0	415
	PRAD	15	0	0	0	0	404	0	0	0	0	0	0	419
	LUSC	6	1	0	20	0	0	386	0	10	0	0	1	424
	LIHC	5	0	0	0	0	0	0	291	0	0	0	0	296
	HNSC	2	1	0	0	0	0	26	0	425	0	0	0	454
	COAD	0	0	0	0	0	0	0	0	0	216	6	0	222
	STAD	7	0	0	1	0	0	1	2	4	3	343	0	361
	KIRP	2	0	10	0	0	0	1	0	0	0	0	229	242
	All	352	918	418	418	414	405	433	295	440	219	351	245	4908
random.shuffle_31_predicted_result_20212241539																Accuracy
	CancerTypes	Normal	BRCA	KIRC	LUAD	THCA	PRAD	LUSC	LIHC	HNSC	COAD	STAD	KIRP	All		0.954
Truth classes	Normal	295	0	1	0	0	2	0	1	2	0	0	0	301
	BRCA	7	911	1	0	0	0	2	0	3	0	0	0	924
	KIRC	4	2	409	0	0	0	0	1	0	0	0	9	425
	LUAD	4	2	2	404	0	0	13	0	0	0	0	0	425
	THCA	19	0	0	0	396	0	0	0	0	0	0	0	415
	PRAD	32	0	0	0	0	387	0	0	0	0	0	0	419
	LUSC	2	2	0	29	0	0	374	1	16	0	0	0	424
	LIHC	4	0	4	0	0	0	0	286	0	0	1	1	296
	HNSC	4	0	0	0	0	0	9	0	441	0	0	0	454
	COAD	1	0	0	0	0	0	0	0	1	216	4	0	222
	STAD	6	0	1	1	0	0	0	0	3	6	344	0	361
	KIRP	2	4	13	1	0	0	1	0	0	0	0	221	242
	All	380	921	431	435	396	389	399	289	466	222	349	231	4908
random.shuffle_32_predicted_result_20212241539																Accuracy
	CancerTypes	Normal	BRCA	KIRC	LUAD	THCA	PRAD	LUSC	LIHC	HNSC	COAD	STAD	KIRP	All		0.955
Truth classes	Normal	298	0	1	0	0	1	0	0	1	0	0	0	301
	BRCA	4	918	0	0	0	0	0	0	2	0	0	0	924
	KIRC	6	3	408	0	0	0	0	1	0	0	0	7	425
	LUAD	8	4	0	403	0	0	10	0	0	0	0	0	425
	THCA	8	0	0	0	407	0	0	0	0	0	0	0	415
	PRAD	25	0	0	0	0	394	0	0	0	0	0	0	419
	LUSC	2	2	0	38	1	0	371	1	8	0	0	1	424
	LIHC	6	1	1	0	0	0	0	288	0	0	0	0	296
	HNSC	5	4	0	0	0	0	21	0	424	0	0	0	454
	COAD	1	0	0	0	0	0	0	0	0	216	5	0	222
	STAD	6	0	0	0	0	0	0	1	2	4	348	0	361
	KIRP	4	1	21	2	0	0	0	0	0	0	0	214	242
	All	373	933	431	443	408	395	402	291	437	220	353	222	4908
random.shuffle_33_predicted_result_20212241540																Accuracy
	CancerTypes	Normal	BRCA	KIRC	LUAD	THCA	PRAD	LUSC	LIHC	HNSC	COAD	STAD	KIRP	All		0.96
Truth classes	Normal	295	0	0	0	1	3	0	0	2	0	0	0	301
	BRCA	9	910	0	0	0	0	1	0	4	0	0	0	924
	KIRC	3	2	408	0	0	0	0	1	2	0	0	9	425
	LUAD	8	1	0	397	0	0	16	1	1	0	1	0	425
	THCA	5	0	0	0	410	0	0	0	0	0	0	0	415
	PRAD	12	0	0	0	0	407	0	0	0	0	0	0	419
	LUSC	1	3	0	23	0	0	380	1	16	0	0	0	424
	LIHC	5	0	2	0	0	0	0	285	2	0	2	0	296
	HNSC	2	1	0	0	0	0	9	0	441	0	1	0	454
	COAD	1	0	0	0	0	0	0	0	0	216	5	0	222
	STAD	4	0	0	1	0	0	0	0	5	4	347	0	361
	KIRP	3	3	17	2	1	0	0	0	0	0	0	216	242
	All	348	920	427	423	412	410	406	288	473	220	356	225	4908
random.shuffle_34_predicted_result_20212241540																Accuracy
	CancerTypes	Normal	BRCA	KIRC	LUAD	THCA	PRAD	LUSC	LIHC	HNSC	COAD	STAD	KIRP	All		0.96
Truth classes	Normal	294	0	0	0	0	6	0	0	1	0	0	0	301
	BRCA	4	917	1	0	0	0	1	0	1	0	0	0	924
	KIRC	2	3	405	0	0	0	0	0	0	0	0	15	425
	LUAD	6	2	0	408	0	0	8	0	0	1	0	0	425
	THCA	8	0	0	0	407	0	0	0	0	0	0	0	415
	PRAD	9	0	0	0	0	410	0	0	0	0	0	0	419
	LUSC	2	3	0	36	0	0	370	1	11	0	0	1	424
	LIHC	7	2	0	0	0	0	0	287	0	0	0	0	296
	HNSC	4	4	0	0	0	0	17	0	429	0	0	0	454
	COAD	0	0	0	0	0	0	0	0	0	215	7	0	222
	STAD	6	0	0	0	0	0	0	1	3	12	339	0	361
	KIRP	3	1	8	1	0	0	0	0	0	0	0	229	242
	All	345	932	414	445	407	416	396	289	445	228	346	245	4908
random.shuffle_35_predicted_result_20212241540																Accuracy
	CancerTypes	Normal	BRCA	KIRC	LUAD	THCA	PRAD	LUSC	LIHC	HNSC	COAD	STAD	KIRP	All		0.953
Truth classes	Normal	293	0	0	0	0	6	0	0	2	0	0	0	301
	BRCA	4	915	0	0	0	0	1	0	3	0	1	0	924
	KIRC	2	2	412	1	0	0	0	1	0	0	0	7	425
	LUAD	4	1	0	394	0	0	23	1	0	0	2	0	425
	THCA	4	0	0	0	411	0	0	0	0	0	0	0	415
	PRAD	8	0	0	0	0	411	0	0	0	0	0	0	419
	LUSC	3	3	0	33	0	0	371	0	13	0	0	1	424
	LIHC	8	0	2	0	0	0	0	285	0	0	0	1	296
	HNSC	5	1	0	0	0	0	24	0	422	0	1	1	454
	COAD	1	0	0	0	0	0	0	0	0	216	5	0	222
	STAD	8	0	0	1	0	0	0	2	3	10	337	0	361
	KIRP	1	1	25	2	0	0	0	0	1	0	0	212	242
	All	341	923	439	431	411	417	419	289	444	226	346	222	4908
random.shuffle_36_predicted_result_20212241540																Accuracy
	CancerTypes	Normal	BRCA	KIRC	LUAD	THCA	PRAD	LUSC	LIHC	HNSC	COAD	STAD	KIRP	All		0.954
Truth classes	Normal	293	0	0	0	1	3	0	1	3	0	0	0	301
	BRCA	3	917	0	0	0	0	3	0	1	0	0	0	924
	KIRC	2	2	402	0	0	0	0	1	0	0	0	18	425
	LUAD	8	2	1	406	0	0	8	0	0	0	0	0	425
	THCA	7	0	0	0	408	0	0	0	0	0	0	0	415
	PRAD	16	0	0	0	0	403	0	0	0	0	0	0	419
	LUSC	3	4	0	42	0	0	363	1	10	0	0	1	424
	LIHC	4	0	2	0	0	0	0	290	0	0	0	0	296
	HNSC	2	4	0	0	0	0	17	0	431	0	0	0	454
	COAD	1	0	0	0	0	0	0	0	0	213	8	0	222
	STAD	9	0	0	0	0	0	0	1	2	16	333	0	361
	KIRP	1	2	13	1	1	0	1	0	0	0	0	223	242
	All	349	931	418	449	410	406	392	294	447	229	341	242	4908
random.shuffle_37_predicted_result_20212241540																Accuracy
	CancerTypes	Normal	BRCA	KIRC	LUAD	THCA	PRAD	LUSC	LIHC	HNSC	COAD	STAD	KIRP	All		0.954
Truth classes	Normal	296	0	0	0	1	3	0	0	1	0	0	0	301
	BRCA	6	910	2	1	0	0	1	0	4	0	0	0	924
	KIRC	5	0	404	0	0	0	0	0	0	0	0	16	425
	LUAD	8	2	1	400	0	0	13	1	0	0	0	0	425
	THCA	4	0	0	0	411	0	0	0	0	0	0	0	415
	PRAD	16	0	0	0	0	403	0	0	0	0	0	0	419
	LUSC	3	2	0	30	0	0	366	1	21	0	0	1	424
	LIHC	8	0	2	0	0	0	0	283	0	0	2	1	296
	HNSC	3	0	0	0	0	0	17	0	434	0	0	0	454
	COAD	1	0	0	0	0	0	0	0	0	216	5	0	222
	STAD	8	0	1	0	0	0	0	1	2	7	342	0	361
	KIRP	4	1	19	0	0	0	0	0	0	0	0	218	242
	All	362	915	429	431	412	406	397	286	462	223	349	236	4908
random.shuffle_38_predicted_result_20212241541																Accuracy
	CancerTypes	Normal	BRCA	KIRC	LUAD	THCA	PRAD	LUSC	LIHC	HNSC	COAD	STAD	KIRP	All		0.954
Truth classes	Normal	298	0	1	0	0	2	0	0	0	0	0	0	301
	BRCA	13	906	1	0	0	0	1	0	2	0	1	0	924
	KIRC	1	2	415	0	0	0	0	1	0	0	0	6	425
	LUAD	12	1	0	400	0	0	9	0	0	0	3	0	425
	THCA	14	0	0	0	401	0	0	0	0	0	0	0	415
	PRAD	10	0	0	0	0	409	0	0	0	0	0	0	419
	LUSC	1	3	0	38	0	1	365	1	15	0	0	0	424
	LIHC	5	0	1	0	0	0	0	290	0	0	0	0	296
	HNSC	10	4	0	0	0	0	17	0	422	0	1	0	454
	COAD	1	0	0	0	0	0	0	0	0	216	5	0	222
	STAD	6	0	0	1	0	0	1	1	4	2	346	0	361
	KIRP	1	1	20	4	0	0	0	0	1	0	0	215	242
	All	372	917	438	443	401	412	393	293	444	218	356	221	4908
random.shuffle_39_predicted_result_20212241541																Accuracy
	CancerTypes	Normal	BRCA	KIRC	LUAD	THCA	PRAD	LUSC	LIHC	HNSC	COAD	STAD	KIRP	All		0.961
Truth classes	Normal	298	0	0	0	1	2	0	0	0	0	0	0	301
	BRCA	6	916	1	0	0	0	0	0	1	0	0	0	924
	KIRC	4	3	410	1	0	0	0	0	0	0	0	7	425
	LUAD	5	3	0	398	0	0	17	1	0	0	1	0	425
	THCA	7	0	0	0	408	0	0	0	0	0	0	0	415
	PRAD	20	0	0	0	0	399	0	0	0	0	0	0	419
	LUSC	2	3	0	20	0	0	379	1	19	0	0	0	424
	LIHC	8	0	2	0	0	0	0	286	0	0	0	0	296
	HNSC	5	4	0	0	0	0	6	0	438	0	1	0	454
	COAD	0	0	0	0	0	0	0	0	0	217	5	0	222
	STAD	7	0	0	0	0	0	1	2	0	5	346	0	361
	KIRP	1	1	17	1	0	0	1	0	0	0	0	221	242
	All	363	930	430	420	409	401	404	290	458	222	353	228	4908
random.shuffle_40_predicted_result_20212241541																Accuracy
	CancerTypes	Normal	BRCA	KIRC	LUAD	THCA	PRAD	LUSC	LIHC	HNSC	COAD	STAD	KIRP	All		0.955
Truth classes	Normal	297	0	0	0	0	2	0	0	2	0	0	0	301
	BRCA	4	916	2	0	0	0	0	0	2	0	0	0	924
	KIRC	2	0	408	0	0	0	0	1	0	0	0	14	425
	LUAD	6	0	1	398	0	0	18	1	1	0	0	0	425
	THCA	12	0	0	0	403	0	0	0	0	0	0	0	415
	PRAD	14	0	0	0	0	405	0	0	0	0	0	0	419
	LUSC	2	1	0	24	0	0	386	1	10	0	0	0	424
	LIHC	5	0	2	0	0	0	0	289	0	0	0	0	296
	HNSC	5	1	1	0	0	0	22	0	425	0	0	0	454
	COAD	0	0	0	0	0	0	0	0	0	208	14	0	222
	STAD	8	0	2	1	0	0	1	1	1	14	333	0	361
	KIRP	1	0	19	2	0	0	2	0	0	0	0	218	242
	All	356	918	435	425	403	407	429	293	441	222	347	232	4908
random.shuffle_41_predicted_result_20212241541																Accuracy
	CancerTypes	Normal	BRCA	KIRC	LUAD	THCA	PRAD	LUSC	LIHC	HNSC	COAD	STAD	KIRP	All		0.949
Truth classes	Normal	297	0	0	0	0	3	0	0	1	0	0	0	301
	BRCA	7	913	1	0	0	0	2	0	1	0	0	0	924
	KIRC	4	1	403	0	0	0	0	1	0	0	0	16	425
	LUAD	5	1	2	398	0	0	17	0	0	0	2	0	425
	THCA	8	0	0	0	407	0	0	0	0	0	0	0	415
	PRAD	28	0	0	0	0	391	0	0	0	0	0	0	419
	LUSC	2	0	0	28	0	1	386	1	6	0	0	0	424
	LIHC	9	0	1	1	0	0	1	281	0	0	3	0	296
	HNSC	3	1	0	0	0	0	34	0	416	0	0	0	454
	COAD	0	0	0	0	0	0	0	0	0	218	4	0	222
	STAD	26	2	0	0	0	0	1	2	1	5	324	0	361
	KIRP	1	1	11	0	0	0	2	0	0	0	1	226	242
	All	390	919	418	427	407	395	443	285	425	223	334	242	4908
random.shuffle_42_predicted_result_20212241541																Accuracy
	CancerTypes	Normal	BRCA	KIRC	LUAD	THCA	PRAD	LUSC	LIHC	HNSC	COAD	STAD	KIRP	All		0.953
Truth classes	Normal	288	1	1	0	7	3	0	1	0	0	0	0	301
	BRCA	3	917	1	0	0	0	0	0	3	0	0	0	924
	KIRC	2	1	404	1	0	0	0	1	0	0	0	16	425
	LUAD	10	1	2	394	0	0	16	1	0	0	1	0	425
	THCA	4	0	0	0	411	0	0	0	0	0	0	0	415
	PRAD	15	0	0	0	0	404	0	0	0	0	0	0	419
	LUSC	3	3	0	33	0	1	373	1	10	0	0	0	424
	LIHC	4	0	1	0	1	2	0	288	0	0	0	0	296
	HNSC	2	2	1	0	0	0	29	0	420	0	0	0	454
	COAD	1	0	0	0	0	0	0	0	0	214	7	0	222
	STAD	7	0	0	1	0	2	0	1	2	10	338	0	361
	KIRP	0	0	10	3	0	1	0	0	0	0	0	228	242
	All	339	925	420	432	419	413	418	293	435	224	346	244	4908
random.shuffle_43_predicted_result_20212241541																Accuracy
	CancerTypes	Normal	BRCA	KIRC	LUAD	THCA	PRAD	LUSC	LIHC	HNSC	COAD	STAD	KIRP	All		0.955
Truth classes	Normal	292	0	1	0	0	7	0	0	1	0	0	0	301
	BRCA	9	913	0	0	0	0	1	0	1	0	0	0	924
	KIRC	4	3	405	1	0	0	0	0	0	0	0	12	425
	LUAD	9	2	0	401	0	0	11	1	1	0	0	0	425
	THCA	12	0	0	0	403	0	0	0	0	0	0	0	415
	PRAD	11	0	0	0	0	408	0	0	0	0	0	0	419
	LUSC	5	4	0	38	0	0	361	1	15	0	0	0	424
	LIHC	9	2	0	0	0	0	0	284	0	0	1	0	296
	HNSC	3	3	0	0	0	0	9	0	439	0	0	0	454
	COAD	0	0	0	0	0	0	0	0	0	220	2	0	222
	STAD	6	0	0	0	0	0	0	2	4	8	341	0	361
	KIRP	0	1	15	2	0	0	0	0	2	0	0	222	242
	All	360	928	421	442	403	415	382	288	463	228	344	234	4908
random.shuffle_44_predicted_result_20212241542																Accuracy
	CancerTypes	Normal	BRCA	KIRC	LUAD	THCA	PRAD	LUSC	LIHC	HNSC	COAD	STAD	KIRP	All		0.957
Truth classes	Normal	292	0	1	0	1	7	0	0	0	0	0	0	301
	BRCA	8	915	0	0	0	0	0	0	1	0	0	0	924
	KIRC	11	4	394	0	0	0	0	1	0	0	0	15	425
	LUAD	5	2	0	400	0	0	17	1	0	0	0	0	425
	THCA	6	0	0	0	409	0	0	0	0	0	0	0	415
	PRAD	11	0	0	0	0	408	0	0	0	0	0	0	419
	LUSC	2	1	0	32	0	0	376	1	12	0	0	0	424
	LIHC	6	2	0	0	0	0	0	288	0	0	0	0	296
	HNSC	4	6	0	0	0	0	14	0	430	0	0	0	454
	COAD	1	0	0	0	0	0	0	0	0	216	5	0	222
	STAD	6	1	0	1	0	0	0	0	3	3	347	0	361
	KIRP	5	2	13	0	1	0	1	0	0	0	0	220	242
	All	357	933	408	433	411	415	408	291	446	219	352	235	4908
random.shuffle_45_predicted_result_20212241542																Accuracy
	CancerTypes	Normal	BRCA	KIRC	LUAD	THCA	PRAD	LUSC	LIHC	HNSC	COAD	STAD	KIRP	All		0.955
Truth classes	Normal	297	0	1	0	1	2	0	0	0	0	0	0	301
	BRCA	9	912	0	0	0	0	2	0	1	0	0	0	924
	KIRC	2	1	411	0	0	0	0	1	0	0	0	10	425
	LUAD	9	2	0	405	0	0	8	1	0	0	0	0	425
	THCA	4	0	0	0	411	0	0	0	0	0	0	0	415
	PRAD	23	0	0	0	0	396	0	0	0	0	0	0	419
	LUSC	1	2	0	37	0	1	367	1	14	0	1	0	424
	LIHC	6	0	5	0	0	0	0	281	1	0	3	0	296
	HNSC	3	2	0	1	0	0	14	0	433	1	0	0	454
	COAD	0	0	0	0	0	0	0	0	0	214	8	0	222
	STAD	6	0	2	0	0	0	0	0	2	4	347	0	361
	KIRP	3	0	19	2	0	0	3	0	0	0	0	215	242
	All	363	919	438	445	412	399	394	284	451	219	359	225	4908
random.shuffle_46_predicted_result_20212241542																Accuracy
	CancerTypes	Normal	BRCA	KIRC	LUAD	THCA	PRAD	LUSC	LIHC	HNSC	COAD	STAD	KIRP	All		0.959
Truth classes	Normal	294	1	1	0	0	3	0	0	2	0	0	0	301
	BRCA	10	912	0	0	0	0	2	0	0	0	0	0	924
	KIRC	4	3	396	1	0	0	0	1	0	0	0	20	425
	LUAD	6	3	1	397	0	0	16	1	0	0	1	0	425
	THCA	8	0	0	0	407	0	0	0	0	0	0	0	415
	PRAD	14	0	0	0	0	405	0	0	0	0	0	0	419
	LUSC	1	2	0	20	0	0	383	1	17	0	0	0	424
	LIHC	7	0	1	0	0	0	0	287	0	0	1	0	296
	HNSC	3	5	0	0	0	0	9	0	437	0	0	0	454
	COAD	0	0	0	0	0	0	0	0	0	219	3	0	222
	STAD	8	0	0	0	0	0	1	1	0	5	346	0	361
	KIRP	3	3	10	1	0	0	0	0	0	0	1	224	242
	All	358	929	409	419	407	408	411	291	456	224	352	244	4908
random.shuffle_47_predicted_result_20212241542																Accuracy
	CancerTypes	Normal	BRCA	KIRC	LUAD	THCA	PRAD	LUSC	LIHC	HNSC	COAD	STAD	KIRP	All		0.958
Truth classes	Normal	293	0	1	1	0	5	0	0	1	0	0	0	301
	BRCA	7	915	0	0	0	0	0	0	2	0	0	0	924
	KIRC	6	2	401	1	0	0	0	0	0	0	0	15	425
	LUAD	1	1	0	412	0	0	10	0	0	0	1	0	425
	THCA	10	0	0	0	405	0	0	0	0	0	0	0	415
	PRAD	10	1	0	0	0	408	0	0	0	0	0	0	419
	LUSC	2	4	0	35	1	0	376	0	6	0	0	0	424
	LIHC	8	0	1	1	0	0	0	286	0	0	0	0	296
	HNSC	3	4	0	0	0	0	15	0	431	0	1	0	454
	COAD	1	0	0	0	0	0	0	0	0	217	4	0	222
	STAD	11	0	0	1	0	0	0	0	1	16	332	0	361
	KIRP	1	2	11	1	1	0	0	0	0	0	0	226	242
	All	353	929	414	452	407	413	401	286	441	233	338	241	4908
random.shuffle_48_predicted_result_20212241542																Accuracy
	CancerTypes	Normal	BRCA	KIRC	LUAD	THCA	PRAD	LUSC	LIHC	HNSC	COAD	STAD	KIRP	All		0.948
Truth classes	Normal	293	1	0	0	0	4	0	1	2	0	0	0	301
	BRCA	3	918	0	0	0	0	1	0	2	0	0	0	924
	KIRC	4	2	407	0	0	0	1	0	0	0	0	11	425
	LUAD	3	5	0	391	0	0	26	0	0	0	0	0	425
	THCA	16	0	0	0	399	0	0	0	0	0	0	0	415
	PRAD	21	0	0	0	0	398	0	0	0	0	0	0	419
	LUSC	3	3	0	23	0	0	381	0	14	0	0	0	424
	LIHC	8	0	0	0	0	0	0	283	2	0	1	2	296
	HNSC	2	1	0	0	0	0	24	0	427	0	0	0	454
	COAD	1	0	0	0	0	0	0	0	0	200	21	0	222
	STAD	7	1	0	0	0	0	2	1	1	11	338	0	361
	KIRP	1	1	19	0	0	0	3	0	0	0	0	218	242
	All	362	932	426	414	399	402	438	285	448	211	360	231	4908
random.shuffle_49_predicted_result_20212241542																Accuracy
	CancerTypes	Normal	BRCA	KIRC	LUAD	THCA	PRAD	LUSC	LIHC	HNSC	COAD	STAD	KIRP	All		0.952
Truth classes	Normal	291	1	1	0	1	5	0	0	2	0	0	0	301
	BRCA	6	912	0	0	0	0	5	0	1	0	0	0	924
	KIRC	3	4	402	0	0	0	0	1	0	0	0	15	425
	LUAD	11	1	0	390	0	0	21	1	0	0	1	0	425
	THCA	8	0	0	0	407	0	0	0	0	0	0	0	415
	PRAD	16	0	0	0	0	403	0	0	0	0	0	0	419
	LUSC	3	0	0	22	0	0	388	1	10	0	0	0	424
	LIHC	8	0	0	0	0	0	1	287	0	0	0	0	296
	HNSC	2	2	0	0	0	0	33	0	417	0	0	0	454
	COAD	0	0	0	0	0	0	0	0	0	217	5	0	222
	STAD	18	0	0	1	0	0	2	1	4	5	330	0	361
	KIRP	0	0	11	0	0	0	2	0	0	0	0	229	242
	All	366	920	414	413	408	408	452	291	434	222	336	244	4908
random.shuffle_50_predicted_result_20212241543																Accuracy
	CancerTypes	Normal	BRCA	KIRC	LUAD	THCA	PRAD	LUSC	LIHC	HNSC	COAD	STAD	KIRP	All		0.955
Truth classes	Normal	296	0	1	0	1	2	0	0	1	0	0	0	301
	BRCA	11	911	0	0	0	0	1	0	1	0	0	0	924
	KIRC	2	1	410	0	0	0	0	1	0	0	0	11	425
	LUAD	11	1	1	404	0	0	8	0	0	0	0	0	425
	THCA	4	0	0	0	411	0	0	0	0	0	0	0	415
	PRAD	25	0	0	0	0	394	0	0	0	0	0	0	419
	LUSC	3	2	0	43	1	0	359	0	15	0	0	1	424
	LIHC	7	0	3	0	0	0	0	286	0	0	0	0	296
	HNSC	5	2	1	0	0	0	17	0	429	0	0	0	454
	COAD	0	0	0	0	0	0	0	0	0	215	7	0	222
	STAD	7	0	0	1	0	0	0	2	1	1	349	0	361
	KIRP	1	0	16	1	0	0	0	0	0	0	0	224	242
	All	372	917	432	449	413	396	385	289	447	216	356	236	4908
